# Supplementary material for: Regional level influenza study based on Twitter and machine learning method
Source: PLoS One. 2019 Apr 23;14(4):e0215600. doi: 10.1371/journal.pone.0215600 (PMC6478375; doi:10.1371/journal.pone.0215600)
Supplement: S1 Table — Distribution of ILIs from week 41st in 2016 to week 43rd in 2017 in ten regions of the United States. (XLSX) [file pone.0215600.s001.xlsx]

## Sheet: Sheet1
REGION TYPE	REGION	YEAR	WEEK	%UNWEIGHTED ILI	ILITOTAL
HHS Regions	Region 1	2016	41	0.590106	282
HHS Regions	Region 2	2016	41	1.66392	2238
HHS Regions	Region 3	2016	41	1.44772	1960
HHS Regions	Region 4	2016	41	1.45288	2131
HHS Regions	Region 5	2016	41	1.01481	1106
HHS Regions	Region 6	2016	41	1.67473	1579
HHS Regions	Region 7	2016	41	0.719224	155
HHS Regions	Region 8	2016	41	0.811834	354
HHS Regions	Region 9	2016	41	1.08131	1125
HHS Regions	Region 10	2016	41	0.499515	67
HHS Regions	Region 1	2016	42	0.682319	347
HHS Regions	Region 2	2016	42	1.73672	2420
HHS Regions	Region 3	2016	42	1.31576	2090
HHS Regions	Region 4	2016	42	1.51243	2372
HHS Regions	Region 5	2016	42	1.17932	1314
HHS Regions	Region 6	2016	42	1.58149	1507
HHS Regions	Region 7	2016	42	0.866598	193
HHS Regions	Region 8	2016	42	0.872622	355
HHS Regions	Region 9	2016	42	1.17596	1250
HHS Regions	Region 10	2016	42	0.549334	78
HHS Regions	Region 1	2016	43	0.644873	332
HHS Regions	Region 2	2016	43	1.81245	2442
HHS Regions	Region 3	2016	43	1.47704	2235
HHS Regions	Region 4	2016	43	1.66763	2622
HHS Regions	Region 5	2016	43	1.22897	1345
HHS Regions	Region 6	2016	43	1.80407	1778
HHS Regions	Region 7	2016	43	0.691776	162
HHS Regions	Region 8	2016	43	0.813271	377
HHS Regions	Region 9	2016	43	1.27548	1267
HHS Regions	Region 10	2016	43	0.598558	88
HHS Regions	Region 1	2016	44	0.779195	397
HHS Regions	Region 2	2016	44	1.99946	2732
HHS Regions	Region 3	2016	44	1.64112	2418
HHS Regions	Region 4	2016	44	1.86843	2939
HHS Regions	Region 5	2016	44	1.38324	1567
HHS Regions	Region 6	2016	44	1.87861	1829
HHS Regions	Region 7	2016	44	0.856978	193
HHS Regions	Region 8	2016	44	0.697171	309
HHS Regions	Region 9	2016	44	1.39656	1304
HHS Regions	Region 10	2016	44	0.686176	102
HHS Regions	Region 1	2016	45	0.701814	369
HHS Regions	Region 2	2016	45	2.2109	2959
HHS Regions	Region 3	2016	45	1.6269	2361
HHS Regions	Region 4	2016	45	1.96436	3059
HHS Regions	Region 5	2016	45	1.4202	1512
HHS Regions	Region 6	2016	45	2.02869	1850
HHS Regions	Region 7	2016	45	0.908094	207
HHS Regions	Region 8	2016	45	0.918751	415
HHS Regions	Region 9	2016	45	1.45214	1398
HHS Regions	Region 10	2016	45	0.901408	128
HHS Regions	Region 1	2016	46	0.753912	410
HHS Regions	Region 2	2016	46	2.26335	3172
HHS Regions	Region 3	2016	46	1.78452	2463
HHS Regions	Region 4	2016	46	2.11566	3177
HHS Regions	Region 5	2016	46	1.44566	1584
HHS Regions	Region 6	2016	46	2.09569	2043
HHS Regions	Region 7	2016	46	0.986947	217
HHS Regions	Region 8	2016	46	0.932093	424
HHS Regions	Region 9	2016	46	1.51483	1567
HHS Regions	Region 10	2016	46	0.733148	103
HHS Regions	Region 1	2016	47	0.788407	284
HHS Regions	Region 2	2016	47	2.73019	3221
HHS Regions	Region 3	2016	47	2.09089	2455
HHS Regions	Region 4	2016	47	2.50169	3152
HHS Regions	Region 5	2016	47	1.51988	1232
HHS Regions	Region 6	2016	47	2.23475	1867
HHS Regions	Region 7	2016	47	1.55282	218
HHS Regions	Region 8	2016	47	1.01375	384
HHS Regions	Region 9	2016	47	1.74891	1306
HHS Regions	Region 10	2016	47	0.893395	89
HHS Regions	Region 1	2016	48	0.709757	384
HHS Regions	Region 2	2016	48	2.64438	3718
HHS Regions	Region 3	2016	48	1.88844	2620
HHS Regions	Region 4	2016	48	2.23278	3525
HHS Regions	Region 5	2016	48	1.37543	1542
HHS Regions	Region 6	2016	48	2.26631	2152
HHS Regions	Region 7	2016	48	1.37507	322
HHS Regions	Region 8	2016	48	1.12139	521
HHS Regions	Region 9	2016	48	1.71045	1695
HHS Regions	Region 10	2016	48	0.878845	126
HHS Regions	Region 1	2016	49	0.796494	418
HHS Regions	Region 2	2016	49	2.84682	4020
HHS Regions	Region 3	2016	49	1.97832	2653
HHS Regions	Region 4	2016	49	2.1001	3076
HHS Regions	Region 5	2016	49	1.6194	1696
HHS Regions	Region 6	2016	49	2.49355	2369
HHS Regions	Region 7	2016	49	1.21488	243
HHS Regions	Region 8	2016	49	1.14724	512
HHS Regions	Region 9	2016	49	1.96259	1875
HHS Regions	Region 10	2016	49	0.782794	99
HHS Regions	Region 1	2016	50	0.918111	471
HHS Regions	Region 2	2016	50	3.13935	4266
HHS Regions	Region 3	2016	50	2.17105	2821
HHS Regions	Region 4	2016	50	2.57596	3455
HHS Regions	Region 5	2016	50	1.74084	1732
HHS Regions	Region 6	2016	50	2.87617	2674
HHS Regions	Region 7	2016	50	1.27988	265
HHS Regions	Region 8	2016	50	1.41439	533
HHS Regions	Region 9	2016	50	2.12355	2057
HHS Regions	Region 10	2016	50	1.60619	189
HHS Regions	Region 1	2016	51	1.03371	463
HHS Regions	Region 2	2016	51	4.01508	5570
HHS Regions	Region 3	2016	51	2.58874	3316
HHS Regions	Region 4	2016	51	3.71975	4182
HHS Regions	Region 5	2016	51	2.02093	1742
HHS Regions	Region 6	2016	51	3.37127	2995
HHS Regions	Region 7	2016	51	1.86084	303
HHS Regions	Region 8	2016	51	2.15634	683
HHS Regions	Region 9	2016	51	2.53852	2135
HHS Regions	Region 10	2016	51	2.01212	176
HHS Regions	Region 1	2016	52	1.33674	429
HHS Regions	Region 2	2016	52	5.0999	6723
HHS Regions	Region 3	2016	52	3.21415	4233
HHS Regions	Region 4	2016	52	4.03416	4421
HHS Regions	Region 5	2016	52	2.58476	2037
HHS Regions	Region 6	2016	52	3.74427	3391
HHS Regions	Region 7	2016	52	2.646	391
HHS Regions	Region 8	2016	52	2.40127	605
HHS Regions	Region 9	2016	52	2.95641	2312
HHS Regions	Region 10	2016	52	4.06172	358
HHS Regions	Region 1	2017	1	1.26449	527
HHS Regions	Region 2	2017	1	4.15711	5748
HHS Regions	Region 3	2017	1	2.89289	4146
HHS Regions	Region 4	2017	1	3.30407	4182
HHS Regions	Region 5	2017	1	2.35385	2171
HHS Regions	Region 6	2017	1	3.56561	3416
HHS Regions	Region 7	2017	1	2.86315	477
HHS Regions	Region 8	2017	1	2.32095	711
HHS Regions	Region 9	2017	1	2.77747	2474
HHS Regions	Region 10	2017	1	3.10417	326
HHS Regions	Region 1	2017	2	1.23433	577
HHS Regions	Region 2	2017	2	4.07592	5579
HHS Regions	Region 3	2017	2	2.98634	3841
HHS Regions	Region 4	2017	2	3.23802	4508
HHS Regions	Region 5	2017	2	2.29415	2461
HHS Regions	Region 6	2017	2	3.81225	3905
HHS Regions	Region 7	2017	2	2.82064	521
HHS Regions	Region 8	2017	2	2.24742	781
HHS Regions	Region 9	2017	2	2.50848	2432
HHS Regions	Region 10	2017	2	2.17845	292
HHS Regions	Region 1	2017	3	1.43032	654
HHS Regions	Region 2	2017	3	4.59092	6513
HHS Regions	Region 3	2017	3	3.07817	4457
HHS Regions	Region 4	2017	3	4.00559	5673
HHS Regions	Region 5	2017	3	2.55267	2770
HHS Regions	Region 6	2017	3	4.28871	4422
HHS Regions	Region 7	2017	3	3.76017	767
HHS Regions	Region 8	2017	3	2.40874	774
HHS Regions	Region 9	2017	3	2.49056	2342
HHS Regions	Region 10	2017	3	3.1006	409
HHS Regions	Region 1	2017	4	1.73869	896
HHS Regions	Region 2	2017	4	4.59112	6645
HHS Regions	Region 3	2017	4	3.2376	4738
HHS Regions	Region 4	2017	4	3.97422	5808
HHS Regions	Region 5	2017	4	2.81287	3273
HHS Regions	Region 6	2017	4	4.74476	4969
HHS Regions	Region 7	2017	4	4.65791	1011
HHS Regions	Region 8	2017	4	2.35789	908
HHS Regions	Region 9	2017	4	2.6038	2654
HHS Regions	Region 10	2017	4	2.58492	363
HHS Regions	Region 1	2017	5	2.15226	1158
HHS Regions	Region 2	2017	5	4.73811	6788
HHS Regions	Region 3	2017	5	3.65659	5375
HHS Regions	Region 4	2017	5	4.83396	7022
HHS Regions	Region 5	2017	5	3.38334	3879
HHS Regions	Region 6	2017	5	6.37865	6839
HHS Regions	Region 7	2017	5	5.94077	1304
HHS Regions	Region 8	2017	5	2.56296	1095
HHS Regions	Region 9	2017	5	2.73707	2706
HHS Regions	Region 10	2017	5	2.42353	351
HHS Regions	Region 1	2017	6	2.79365	1305
HHS Regions	Region 2	2017	6	4.84631	6677
HHS Regions	Region 3	2017	6	4.88647	7440
HHS Regions	Region 4	2017	6	5.55331	8537
HHS Regions	Region 5	2017	6	3.96033	4796
HHS Regions	Region 6	2017	6	7.61495	8549
HHS Regions	Region 7	2017	6	6.9993	1609
HHS Regions	Region 8	2017	6	2.79243	1202
HHS Regions	Region 9	2017	6	2.47009	2455
HHS Regions	Region 10	2017	6	2.51651	320
HHS Regions	Region 1	2017	7	2.63222	1300
HHS Regions	Region 2	2017	7	3.89122	5330
HHS Regions	Region 3	2017	7	5.39126	8404
HHS Regions	Region 4	2017	7	6.19715	9087
HHS Regions	Region 5	2017	7	4.36675	5168
HHS Regions	Region 6	2017	7	6.77883	7208
HHS Regions	Region 7	2017	7	5.39353	1178
HHS Regions	Region 8	2017	7	2.39633	939
HHS Regions	Region 9	2017	7	2.24462	2098
HHS Regions	Region 10	2017	7	2.28883	323
HHS Regions	Region 1	2017	8	2.67155	1226
HHS Regions	Region 2	2017	8	3.35612	4493
HHS Regions	Region 3	2017	8	5.85189	9685
HHS Regions	Region 4	2017	8	6.11492	9006
HHS Regions	Region 5	2017	8	4.29165	5002
HHS Regions	Region 6	2017	8	6.30694	6729
HHS Regions	Region 7	2017	8	4.47199	974
HHS Regions	Region 8	2017	8	2.05675	801
HHS Regions	Region 9	2017	8	2.21178	1940
HHS Regions	Region 10	2017	8	1.96136	268
HHS Regions	Region 1	2017	9	1.89924	999
HHS Regions	Region 2	2017	9	2.52976	3385
HHS Regions	Region 3	2017	9	3.74277	5834
HHS Regions	Region 4	2017	9	4.96305	7180
HHS Regions	Region 5	2017	9	3.17637	3617
HHS Regions	Region 6	2017	9	5.46935	5636
HHS Regions	Region 7	2017	9	3.138	694
HHS Regions	Region 8	2017	9	1.40827	545
HHS Regions	Region 9	2017	9	2.14368	2041
HHS Regions	Region 10	2017	9	1.84588	252
HHS Regions	Region 1	2017	10	1.88573	902
HHS Regions	Region 2	2017	10	2.3161	2984
HHS Regions	Region 3	2017	10	3.47463	5370
HHS Regions	Region 4	2017	10	4.84231	6599
HHS Regions	Region 5	2017	10	3.30437	3697
HHS Regions	Region 6	2017	10	4.96286	5192
HHS Regions	Region 7	2017	10	3.07111	618
HHS Regions	Region 8	2017	10	1.4555	559
HHS Regions	Region 9	2017	10	2.07631	1964
HHS Regions	Region 10	2017	10	1.2099	175
HHS Regions	Region 1	2017	11	1.80802	692
HHS Regions	Region 2	2017	11	2.43223	2906
HHS Regions	Region 3	2017	11	3.55227	5230
HHS Regions	Region 4	2017	11	4.54861	6162
HHS Regions	Region 5	2017	11	2.98238	3138
HHS Regions	Region 6	2017	11	4.30806	4201
HHS Regions	Region 7	2017	11	2.86025	526
HHS Regions	Region 8	2017	11	1.27263	476
HHS Regions	Region 9	2017	11	2.07675	1938
HHS Regions	Region 10	2017	11	1.64474	215
HHS Regions	Region 1	2017	12	1.90753	972
HHS Regions	Region 2	2017	12	2.41791	3371
HHS Regions	Region 3	2017	12	3.5999	5668
HHS Regions	Region 4	2017	12	5.12532	7609
HHS Regions	Region 5	2017	12	2.90768	3194
HHS Regions	Region 6	2017	12	3.74759	3808
HHS Regions	Region 7	2017	12	2.20377	430
HHS Regions	Region 8	2017	12	1.18558	441
HHS Regions	Region 9	2017	12	1.84069	1710
HHS Regions	Region 10	2017	12	1.19879	151
HHS Regions	Region 1	2017	13	1.97461	1033
HHS Regions	Region 2	2017	13	2.87652	3937
HHS Regions	Region 3	2017	13	3.55205	5414
HHS Regions	Region 4	2017	13	4.02232	5781
HHS Regions	Region 5	2017	13	2.52413	2686
HHS Regions	Region 6	2017	13	3.07808	3040
HHS Regions	Region 7	2017	13	1.61956	314
HHS Regions	Region 8	2017	13	1.06118	401
HHS Regions	Region 9	2017	13	1.85264	1576
HHS Regions	Region 10	2017	13	1.26442	160
HHS Regions	Region 1	2017	14	2.11428	1136
HHS Regions	Region 2	2017	14	2.79146	3858
HHS Regions	Region 3	2017	14	2.46224	3666
HHS Regions	Region 4	2017	14	2.9401	3785
HHS Regions	Region 5	2017	14	2.09087	2296
HHS Regions	Region 6	2017	14	2.75521	2649
HHS Regions	Region 7	2017	14	1.48155	310
HHS Regions	Region 8	2017	14	0.956435	337
HHS Regions	Region 9	2017	14	1.73805	1501
HHS Regions	Region 10	2017	14	1.13072	139
HHS Regions	Region 1	2017	15	1.74675	887
HHS Regions	Region 2	2017	15	2.44738	3200
HHS Regions	Region 3	2017	15	1.7175	2365
HHS Regions	Region 4	2017	15	2.4097	3067
HHS Regions	Region 5	2017	15	1.55635	1688
HHS Regions	Region 6	2017	15	2.54716	2440
HHS Regions	Region 7	2017	15	1.06921	207
HHS Regions	Region 8	2017	15	0.843247	297
HHS Regions	Region 9	2017	15	1.52279	1283
HHS Regions	Region 10	2017	15	0.915148	114
HHS Regions	Region 1	2017	16	1.34377	565
HHS Regions	Region 2	2017	16	1.91213	2533
HHS Regions	Region 3	2017	16	1.33523	1852
HHS Regions	Region 4	2017	16	2.0172	2552
HHS Regions	Region 5	2017	16	1.39188	1480
HHS Regions	Region 6	2017	16	2.33032	2058
HHS Regions	Region 7	2017	16	0.933038	181
HHS Regions	Region 8	2017	16	0.746269	274
HHS Regions	Region 9	2017	16	1.58175	1415
HHS Regions	Region 10	2017	16	0.750528	96
HHS Regions	Region 1	2017	17	0.942013	437
HHS Regions	Region 2	2017	17	1.75654	2345
HHS Regions	Region 3	2017	17	1.07604	1466
HHS Regions	Region 4	2017	17	1.67517	2210
HHS Regions	Region 5	2017	17	1.29093	1405
HHS Regions	Region 6	2017	17	2.15606	2169
HHS Regions	Region 7	2017	17	0.836993	162
HHS Regions	Region 8	2017	17	0.775464	267
HHS Regions	Region 9	2017	17	1.64435	1390
HHS Regions	Region 10	2017	17	0.584655	73
HHS Regions	Region 1	2017	18	0.773716	353
HHS Regions	Region 2	2017	18	1.63007	2219
HHS Regions	Region 3	2017	18	1.02528	1346
HHS Regions	Region 4	2017	18	1.57782	1971
HHS Regions	Region 5	2017	18	1.14916	1203
HHS Regions	Region 6	2017	18	1.98062	1817
HHS Regions	Region 7	2017	18	0.793696	139
HHS Regions	Region 8	2017	18	0.82706	256
HHS Regions	Region 9	2017	18	1.55815	1342
HHS Regions	Region 10	2017	18	0.945472	116
HHS Regions	Region 1	2017	19	0.712394	312
HHS Regions	Region 2	2017	19	1.77886	2405
HHS Regions	Region 3	2017	19	0.88216	1167
HHS Regions	Region 4	2017	19	1.63757	1932
HHS Regions	Region 5	2017	19	1.24621	1262
HHS Regions	Region 6	2017	19	1.76524	1644
HHS Regions	Region 7	2017	19	0.498352	65
HHS Regions	Region 8	2017	19	0.617656	215
HHS Regions	Region 9	2017	19	1.40555	1128
HHS Regions	Region 10	2017	19	0.661765	72
HHS Regions	Region 1	2017	20	0.681419	283
HHS Regions	Region 2	2017	20	1.81914	2451
HHS Regions	Region 3	2017	20	0.881957	1132
HHS Regions	Region 4	2017	20	1.56045	1772
HHS Regions	Region 5	2017	20	1.09245	1019
HHS Regions	Region 6	2017	20	1.91182	1757
HHS Regions	Region 7	2017	20	0.316706	32
HHS Regions	Region 8	2017	20	0.565395	151
HHS Regions	Region 9	2017	20	1.46574	1134
HHS Regions	Region 10	2017	20	0.725042	78
HHS Regions	Region 1	2017	21	0.577944	221
HHS Regions	Region 2	2017	21	1.55319	1982
HHS Regions	Region 3	2017	21	0.947104	1152
HHS Regions	Region 4	2017	21	1.49808	1540
HHS Regions	Region 5	2017	21	0.994678	785
HHS Regions	Region 6	2017	21	1.82355	1526
HHS Regions	Region 7	2017	21	0.209309	21
HHS Regions	Region 8	2017	21	0.691373	161
HHS Regions	Region 9	2017	21	1.41635	1141
HHS Regions	Region 10	2017	21	0.35667	35
HHS Regions	Region 1	2017	22	0.718693	219
HHS Regions	Region 2	2017	22	1.68665	2057
HHS Regions	Region 3	2017	22	1.04702	1145
HHS Regions	Region 4	2017	22	1.18443	1194
HHS Regions	Region 5	2017	22	0.958927	692
HHS Regions	Region 6	2017	22	1.7236	1390
HHS Regions	Region 7	2017	22	0.250744	16
HHS Regions	Region 8	2017	22	0.496968	100
HHS Regions	Region 9	2017	22	1.3656	905
HHS Regions	Region 10	2017	22	0.429767	38
HHS Regions	Region 1	2017	23	0.608884	217
HHS Regions	Region 2	2017	23	1.74865	2219
HHS Regions	Region 3	2017	23	0.896509	949
HHS Regions	Region 4	2017	23	1.0708	1108
HHS Regions	Region 5	2017	23	0.852765	625
HHS Regions	Region 6	2017	23	1.4616	1181
HHS Regions	Region 7	2017	23	0.262743	20
HHS Regions	Region 8	2017	23	0.392875	118
HHS Regions	Region 9	2017	23	1.39075	1036
HHS Regions	Region 10	2017	23	0.408975	37
HHS Regions	Region 1	2017	24	0.60428	216
HHS Regions	Region 2	2017	24	1.48711	1870
HHS Regions	Region 3	2017	24	0.745672	774
HHS Regions	Region 4	2017	24	1.0178	1059
HHS Regions	Region 5	2017	24	0.758219	536
HHS Regions	Region 6	2017	24	1.51529	1202
HHS Regions	Region 7	2017	24	0.237563	17
HHS Regions	Region 8	2017	24	0.337688	84
HHS Regions	Region 9	2017	24	1.15843	850
HHS Regions	Region 10	2017	24	0.339765	28
HHS Regions	Region 1	2017	25	0.538668	185
HHS Regions	Region 2	2017	25	1.43776	1757
HHS Regions	Region 3	2017	25	0.806536	847
HHS Regions	Region 4	2017	25	0.852866	854
HHS Regions	Region 5	2017	25	0.762994	559
HHS Regions	Region 6	2017	25	1.43586	1148
HHS Regions	Region 7	2017	25	0.149762	11
HHS Regions	Region 8	2017	25	0.385654	110
HHS Regions	Region 9	2017	25	1.01207	732
HHS Regions	Region 10	2017	25	0.676046	37
HHS Regions	Region 1	2017	26	0.430433	71
HHS Regions	Region 2	2017	26	1.38952	1723
HHS Regions	Region 3	2017	26	0.773235	710
HHS Regions	Region 4	2017	26	0.807608	749
HHS Regions	Region 5	2017	26	0.701646	454
HHS Regions	Region 6	2017	26	1.25721	983
HHS Regions	Region 7	2017	26	0.29098	21
HHS Regions	Region 8	2017	26	0.299593	89
HHS Regions	Region 9	2017	26	1.10378	770
HHS Regions	Region 10	2017	26	0.355823	26
HHS Regions	Region 1	2017	27	0.504922	119
HHS Regions	Region 2	2017	27	1.39454	1600
HHS Regions	Region 3	2017	27	0.683374	652
HHS Regions	Region 4	2017	27	0.936131	846
HHS Regions	Region 5	2017	27	0.605981	368
HHS Regions	Region 6	2017	27	1.30532	1035
HHS Regions	Region 7	2017	27	0.224486	13
HHS Regions	Region 8	2017	27	0.32618	76
HHS Regions	Region 9	2017	27	1.04449	606
HHS Regions	Region 10	2017	27	0.183089	11
HHS Regions	Region 1	2017	28	0.461816	138
HHS Regions	Region 2	2017	28	1.20219	1399
HHS Regions	Region 3	2017	28	0.627225	613
HHS Regions	Region 4	2017	28	0.763305	758
HHS Regions	Region 5	2017	28	0.660922	451
HHS Regions	Region 6	2017	28	1.0904	853
HHS Regions	Region 7	2017	28	0.081092	6
HHS Regions	Region 8	2017	28	0.355406	95
HHS Regions	Region 9	2017	28	0.924871	633
HHS Regions	Region 10	2017	28	0.210704	15
HHS Regions	Region 1	2017	29	0.378485	109
HHS Regions	Region 2	2017	29	1.15842	1373
HHS Regions	Region 3	2017	29	0.626889	587
HHS Regions	Region 4	2017	29	0.716205	653
HHS Regions	Region 5	2017	29	0.603404	413
HHS Regions	Region 6	2017	29	1.18788	865
HHS Regions	Region 7	2017	29	0.123035	9
HHS Regions	Region 8	2017	29	0.284537	78
HHS Regions	Region 9	2017	29	0.937545	650
HHS Regions	Region 10	2017	29	0.138293	10
HHS Regions	Region 1	2017	30	0.392583	112
HHS Regions	Region 2	2017	30	1.21813	1419
HHS Regions	Region 3	2017	30	0.614978	586
HHS Regions	Region 4	2017	30	0.699615	639
HHS Regions	Region 5	2017	30	0.611616	421
HHS Regions	Region 6	2017	30	1.15093	1023
HHS Regions	Region 7	2017	30	0.288973	19
HHS Regions	Region 8	2017	30	0.272688	75
HHS Regions	Region 9	2017	30	0.879021	578
HHS Regions	Region 10	2017	30	0.101818	7
HHS Regions	Region 1	2017	31	0.396607	108
HHS Regions	Region 2	2017	31	1.16036	1339
HHS Regions	Region 3	2017	31	0.678531	647
HHS Regions	Region 4	2017	31	0.685362	632
HHS Regions	Region 5	2017	31	0.639481	430
HHS Regions	Region 6	2017	31	1.25318	1001
HHS Regions	Region 7	2017	31	0.305577	20
HHS Regions	Region 8	2017	31	0.299064	85
HHS Regions	Region 9	2017	31	0.844228	607
HHS Regions	Region 10	2017	31	0.481232	30
HHS Regions	Region 1	2017	32	0.383509	108
HHS Regions	Region 2	2017	32	1.19392	1391
HHS Regions	Region 3	2017	32	0.600416	557
HHS Regions	Region 4	2017	32	0.846747	798
HHS Regions	Region 5	2017	32	0.612002	417
HHS Regions	Region 6	2017	32	1.15964	943
HHS Regions	Region 7	2017	32	0.202869	14
HHS Regions	Region 8	2017	32	0.301723	86
HHS Regions	Region 9	2017	32	0.822629	577
HHS Regions	Region 10	2017	32	0.365909	24
HHS Regions	Region 1	2017	33	0.441373	122
HHS Regions	Region 2	2017	33	1.06165	1195
HHS Regions	Region 3	2017	33	0.619933	546
HHS Regions	Region 4	2017	33	1.0912	1098
HHS Regions	Region 5	2017	33	0.654256	453
HHS Regions	Region 6	2017	33	1.31887	1065
HHS Regions	Region 7	2017	33	0.153218	12
HHS Regions	Region 8	2017	33	0.310198	88
HHS Regions	Region 9	2017	33	0.938131	637
HHS Regions	Region 10	2017	33	0.189908	14
HHS Regions	Region 1	2017	34	0.425022	117
HHS Regions	Region 2	2017	34	1.16433	1364
HHS Regions	Region 3	2017	34	0.625839	606
HHS Regions	Region 4	2017	34	1.37113	1507
HHS Regions	Region 5	2017	34	0.650544	471
HHS Regions	Region 6	2017	34	1.73649	1447
HHS Regions	Region 7	2017	34	0.255428	24
HHS Regions	Region 8	2017	34	0.35655	101
HHS Regions	Region 9	2017	34	1.24832	991
HHS Regions	Region 10	2017	34	0.34478	25
HHS Regions	Region 1	2017	35	0.377212	107
HHS Regions	Region 2	2017	35	1.13778	1335
HHS Regions	Region 3	2017	35	0.738146	708
HHS Regions	Region 4	2017	35	1.52405	1668
HHS Regions	Region 5	2017	35	0.751118	571
HHS Regions	Region 6	2017	35	1.93005	1544
HHS Regions	Region 7	2017	35	0.136943	13
HHS Regions	Region 8	2017	35	0.496722	147
HHS Regions	Region 9	2017	35	1.23948	1000
HHS Regions	Region 10	2017	35	0.352392	40
HHS Regions	Region 1	2017	36	0.35267	98
HHS Regions	Region 2	2017	36	1.12047	1299
HHS Regions	Region 3	2017	36	0.821776	842
HHS Regions	Region 4	2017	36	1.45069	1545
HHS Regions	Region 5	2017	36	0.939576	645
HHS Regions	Region 6	2017	36	1.91853	1624
HHS Regions	Region 7	2017	36	0.323625	26
HHS Regions	Region 8	2017	36	0.523935	139
HHS Regions	Region 9	2017	36	1.1752	814
HHS Regions	Region 10	2017	36	0.384874	40
HHS Regions	Region 1	2017	37	0.488537	166
HHS Regions	Region 2	2017	37	1.27256	1749
HHS Regions	Region 3	2017	37	0.775689	899
HHS Regions	Region 4	2017	37	1.35773	1409
HHS Regions	Region 5	2017	37	1.06798	916
HHS Regions	Region 6	2017	37	1.90945	1733
HHS Regions	Region 7	2017	37	0.247721	25
HHS Regions	Region 8	2017	37	0.370492	248
HHS Regions	Region 9	2017	37	1.43102	1093
HHS Regions	Region 10	2017	37	0.562852	66
HHS Regions	Region 1	2017	38	0.508396	175
HHS Regions	Region 2	2017	38	1.47941	2019
HHS Regions	Region 3	2017	38	0.864202	999
HHS Regions	Region 4	2017	38	1.31049	1483
HHS Regions	Region 5	2017	38	1.15073	1003
HHS Regions	Region 6	2017	38	1.79808	1664
HHS Regions	Region 7	2017	38	0.535077	54
HHS Regions	Region 8	2017	38	0.312246	177
HHS Regions	Region 9	2017	38	1.30317	917
HHS Regions	Region 10	2017	38	0.615017	72
HHS Regions	Region 1	2017	39	0.502701	161
HHS Regions	Region 2	2017	39	1.47923	2096
HHS Regions	Region 3	2017	39	0.983121	975
HHS Regions	Region 4	2017	39	1.48617	1637
HHS Regions	Region 5	2017	39	1.23893	1090
HHS Regions	Region 6	2017	39	1.96395	1798
HHS Regions	Region 7	2017	39	0.508388	50
HHS Regions	Region 8	2017	39	0.392526	300
HHS Regions	Region 9	2017	39	1.23262	921
HHS Regions	Region 10	2017	39	0.535658	51
HHS Regions	Region 1	2017	40	0.659029	302
HHS Regions	Region 2	2017	40	1.40958	2017
HHS Regions	Region 3	2017	40	1.07097	2189
HHS Regions	Region 4	2017	40	1.56317	2504
HHS Regions	Region 5	2017	40	1.10788	1251
HHS Regions	Region 6	2017	40	1.9123	2180
HHS Regions	Region 7	2017	40	0.859623	206
HHS Regions	Region 8	2017	40	0.520749	353
HHS Regions	Region 9	2017	40	1.65434	1396
HHS Regions	Region 10	2017	40	0.951621	441
HHS Regions	Region 1	2017	41	0.77879	413
HHS Regions	Region 2	2017	41	1.50408	2134
HHS Regions	Region 3	2017	41	1.1312	2143
HHS Regions	Region 4	2017	41	1.61888	2642
HHS Regions	Region 5	2017	41	1.16117	1293
HHS Regions	Region 6	2017	41	1.9931	2275
HHS Regions	Region 7	2017	41	0.946268	230
HHS Regions	Region 8	2017	41	0.635018	416
HHS Regions	Region 9	2017	41	1.46569	1237
HHS Regions	Region 10	2017	41	0.981147	484
HHS Regions	Region 1	2017	42	0.750669	415
HHS Regions	Region 2	2017	42	1.71154	2514
HHS Regions	Region 3	2017	42	1.21089	2287
HHS Regions	Region 4	2017	42	1.63423	2636
HHS Regions	Region 5	2017	42	1.10251	1279
HHS Regions	Region 6	2017	42	2.18832	2467
HHS Regions	Region 7	2017	42	1.1854	314
HHS Regions	Region 8	2017	42	0.640767	428
HHS Regions	Region 9	2017	42	1.48926	1369
HHS Regions	Region 10	2017	42	1.20109	610
HHS Regions	Region 1	2017	43	0.910621	514
HHS Regions	Region 2	2017	43	1.80144	2660
HHS Regions	Region 3	2017	43	1.32338	2454
HHS Regions	Region 4	2017	43	1.965	3263
HHS Regions	Region 5	2017	43	1.18805	1353
HHS Regions	Region 6	2017	43	2.35963	2693
HHS Regions	Region 7	2017	43	1.28195	340
HHS Regions	Region 8	2017	43	0.922142	510
HHS Regions	Region 9	2017	43	1.57316	1474
HHS Regions	Region 10	2017	43	1.19291	571
